# Supplementary material
Source: PubMed Central journal article supplement (PMC9640784)
Supplement: 41573_2022_579_MOESM1_ESM.pdf [file 41573_2022_579_MOESM1_ESM.pdf]

---

# Targeting HER2-positive breast cancer: advances and future directions

---

In the format provided by the authors and unedited

---

**Supplementary Table 1. Pivotal trials with approved anti-HER2 therapies**

| Approved Anti-HER2 Agent     | Trial Name       | Patient Population (HER2+ BC) | Number of patients | Trial Information                                           | Key Trial Results                                                                                                                                                                                  | Reference                          |
|------------------------------|------------------|-------------------------------|--------------------|-------------------------------------------------------------|----------------------------------------------------------------------------------------------------------------------------------------------------------------------------------------------------|------------------------------------|
| <b>Monoclonal antibodies</b> |                  |                               |                    |                                                             |                                                                                                                                                                                                    |                                    |
| Trastuzumab                  | --               | MBC, No prior therapy for MBC | 469                | Phase 3: chemo +/- H                                        | Median TTP 7.4 mo (chemo+H) vs 4.6 mo (chemo) (p<0.001)<br>Median OS 25.1 mo vs 20.3 mo (p=0.046)                                                                                                  | Slamon et al <sup>1</sup>          |
|                              | HERA             | EBC post breast surgery       | 1694               | Phase 3 adjuvant H (1 y) vs H (2 y) vs observation only     | 2-y DFS 77.4% (observation) vs 85.8% (H 1 y) (p<0.0001)<br>2-y TTDR 82.8% vs 90.6% (p<0.0001)<br>2-y OS 95.1% vs 96.0% (p=0.26)                                                                    | Piccart-Gebhart et al <sup>2</sup> |
|                              | NSABP B-31/N9831 | EBC post breast surgery       | 3351               | Phase 3 adjuvant chemo vs chemo→H*                          | HR for 1st event 0.48, p<0.0001;<br>4-y DFS 67.1% (chemo) vs 85.3% (chemo→H) (95% CI 12.7%-23.7%)<br><br>HR for death 0.67, p=0.015;<br>4-y OS 86.6% (chemo) vs 94.1% (chemo→H) (95% CI 0.6%-9.0%) | Romond et al <sup>3</sup>          |
|                              | BCIRG 006        | EBC post breast surgery       | 3222               | Phase 3 adjuvant AC→D vs AC→D+H (1 y) vs DCb+H (1 y)        | 5-y DFS 75% (AC→D) vs 84% (AC→D+H), HR 0.47, p=0.003;<br>81% (DCb+H), HR 0.64, p=0.06<br>OS 87% (AC→D); 92% (AC→D+H); 91% (DCb+H)                                                                  | Slamon et al <sup>4</sup>          |
| Pertuzumab                   | CLEOPATRA        | MBC, No prior therapy for MBC | 808                | Phase 3 first line metastatic H+D + PTZ or placebo          | Median PFS 12.4 mo (H+D+placebo) vs 18.7 mo (H+D+PTZ) (HR 0.68, p<0.001)<br>Median OS 40.8 mo vs 56.5 mo (HR 0.68, p<0.001)                                                                        | Swain et al <sup>5</sup>           |
|                              | APHINITY         | EBC, post breast surgery      | 4805               | Phase 3 adjuvant H+chemo + PTZ or placebo                   | 3-y iDFS (ITT): 93.2% (H+chemo+placebo) vs 94.1% (H+chemo+PTZ) (HR 0.81; p=0.045)<br>3-y iDFS (node +): 90.2% vs 92.0% (HR 0.77; p=0.02)                                                           | von Minckwitz et al <sup>6</sup>   |
|                              | NeoSphere        | EBC, pre-operative            | 417                | Phase 2 neoadjuvant HD vs PTZ-H-D vs PTZ-H vs PTZ-D         | pCR (ypT0N0) 29% (HD); 45.8% (PTZ-H-D); 16.8% (PH); 24% (PTZ-D)                                                                                                                                    | Gianni et al <sup>7</sup>          |
|                              | TYPHAENA         | EBC, pre-operative            | 225                | Phase 2 neoadjuvant FEC+H+PTZ→DH+PTZ (Arm A) vs FEC→D+H+PTZ | pCR (ypT0/is) 61.6% (Arm A); 57.3% (Arm B); 66.2% (Arm C)                                                                                                                                          | Schneeweiss et al <sup>8</sup>     |

|                                   |             |                                                       |                 |                                                                   |                                                                                                                                         |                                                                    |
|-----------------------------------|-------------|-------------------------------------------------------|-----------------|-------------------------------------------------------------------|-----------------------------------------------------------------------------------------------------------------------------------------|--------------------------------------------------------------------|
|                                   |             |                                                       |                 | (Arm B) vs D-Cb-H+PTZ (Arm C)                                     |                                                                                                                                         |                                                                    |
| Margetuximab                      | SOPHIA      | MBC, 1-3 prior chemo                                  | 536             | Phase 3 chemo + H or margetuximab                                 | Median PFS 4.9 mo (chemo+H) vs 5.8 mo (chemo+margetuximab) (HR 0.76, p=0.03)<br>Median OS 19.8 mo vs 21.6 mo (HR 0.89, p=0.33)          | Rugo et al <sup>9</sup>                                            |
| <b>Tyrosine kinase inhibitors</b> |             |                                                       |                 |                                                                   |                                                                                                                                         |                                                                    |
| Lapatinib                         |             | MBC, progression on prior anthracycline, taxane and H | 324             | Phase 3 cape +/- L                                                | Median TTP 4.4 mo (cape) vs 8.4 mo (cape + L) (HR 0.49, p<0.001)<br>Median PFS 4.1 mo vs 8.4 mo (HR 0.47, p<0.001)                      | Geyer et al <sup>10</sup>                                          |
|                                   |             | MBC, No prior therapy for MBC                         | 219 (HR+/HER2+) | Phase 3 letrozole + L or placebo                                  | Median PFS 3.0 mo (letrozole+placebo) vs 8.2 mo (letrozole+L) (HR 0.71, p=0.019)                                                        | Johnston et al <sup>11</sup>                                       |
|                                   | NeoALTTO    | EBC, pre-operative                                    | 455             | Phase 3 neoadjuvant (+ taxane) and post-neoadjuvant L vs H vs H+L | pCR 51.3% (H+L) vs 29.5% (H) (p=0.0001)                                                                                                 | Baselga et al <sup>12</sup>                                        |
|                                   | GeparQuinto | EBC, pre-operative                                    | 620             | Phase 3 neoadjuvant EC→D with H vs L                              | pCR 30.3% (H) vs 22.7% (L) (p=0.04)                                                                                                     | Untch et al <sup>13</sup>                                          |
|                                   | NSABP B-41  | EBC, pre-operative                                    | 519             | Phase 3 neoadjuvant AC→P weekly + L vs H vs L+H                   | pCR (breast) 52.5% (H) vs 53.2% (L) vs 62% (L+H) (p=0.095 L+H vs H)                                                                     | Robidoux et al <sup>14</sup>                                       |
|                                   | CALGB 40601 | EBC, pre-operative                                    | 305             | Neoadjuvant P+L+H vs P+L vs P+H                                   | pCR 56% (P+L+H) vs 46% (P+H) (p=0.13)<br>After 7 y follow-up, improvement in RFS and OS with P+L+H                                      | Carey et al <sup>15</sup> ; Fernandez-Martinez et al <sup>16</sup> |
|                                   | ALTTO       | EBC, post breast surgery                              | 8381            | Phase 3 adjuvant H+L vs sequential H→L vs H or L alone            | No difference in DFS - H+L vs H alone, p=0.61                                                                                           | Piccant-Gebhart et al <sup>17</sup>                                |
| Neratinib                         | NALA        | MBC, 2 prior lines of therapy                         | 621             | Phase 3 cape + L or N                                             | PFS 8.8 mo (cape+N) vs 6.6 mo (cape+L) (HR 0.76, p=0.0059)<br>Fewer interventions for CNS disease with cape+N vs cape+L                 | Saura et al <sup>18</sup>                                          |
|                                   | ExteNET     | EBC, post adjuvant chemo + H                          | 2840            | Phase 3 adjuvant N vs placebo x 1 y                               | Absolute 5-y iDFS benefit with N vs placebo 5.1%<br>Absolute 8-y OS benefit with N vs placebo 2.1%<br>iDFS benefit with N higher in HR+ | Chan et al <sup>19</sup>                                           |

|                                 |                  |                                                                           |                              |                                       |                                                                                                                                                                                                                                                                                        |                                                         |
|---------------------------------|------------------|---------------------------------------------------------------------------|------------------------------|---------------------------------------|----------------------------------------------------------------------------------------------------------------------------------------------------------------------------------------------------------------------------------------------------------------------------------------|---------------------------------------------------------|
|                                 |                  |                                                                           |                              |                                       | disease (HR 0.51, p=0.0013) vs HR- disease (HR 0.93, p=0.74)                                                                                                                                                                                                                           |                                                         |
| Tucatinib                       | HER2CLIMB        | MBC, treated with H, PTZ and T-DM1, with or without active brain mets     | 612                          | Phase 3 H+cape + tucatinib or placebo | Median PFS 7.8 mo (H+cape+tucatinib) vs 5.6 mo (H+cape) (HR 0.54, p <0.001)<br>Median OS 21.9 mo vs 17.4 mo (HR 0.66, p=0.005)<br>Brain metastases population: Median CNS-PFS 9.9 mo vs 4.2 mo (HR 0.32, p <0.0001) (n=291)<br>Median OS 18.1 mo vs 12.0 mo (HR 0.58, p=0.005) (n=291) | Murthy et al <sup>20</sup> ;<br>Lin et al <sup>21</sup> |
| Pyrotinib <sup>¶</sup>          | PHOEBE           | MBC, treated with H and taxane                                            | 267                          | Phase 3 cape + Py or L                | Median PFS 12.5 mo (cape+Py) vs 6.8 mo (cape+L) (p<0.0001)<br>Median OS not reached (cape+Py) vs 26.9 mo (cape+L) (HR 0.69, p=0.02)                                                                                                                                                    | Xu et al <sup>22</sup> ; Xu et al <sup>23</sup>         |
|                                 | PERMEATE         | MBC, with brain mets (RT naïve or progression after RT)                   | 78                           | Phase 2 cape + Py                     | Intracranial ORR 74.6% in RT-naïve patients and 42.1% in patients who received prior RT for brain metastases                                                                                                                                                                           | Yan et al <sup>24</sup>                                 |
| <b>Antibody-drug conjugates</b> |                  |                                                                           |                              |                                       |                                                                                                                                                                                                                                                                                        |                                                         |
| Trastuzumab emtansine (T-DM1)   | EMILIA           | MBC, treated with H and taxane                                            | 991                          | Phase 3 T-DM1 vs cape+L               | Median PFS 9.6 mo (T-DM1) vs 6.4 mo (cape+L) (HR 0.65, p<0.001)<br>Median OS 30.9 mo vs 25.1 mo (HR 0.68, p<0.001)                                                                                                                                                                     | Verma et al <sup>25</sup>                               |
|                                 | KATHERINE        | EBC, with residual disease post breast surgery; treated with H and taxane | 1486                         | Phase 3 T-DM1 vs H (1 y)              | 3-y iDFS 88.3% (T-DM1) vs 77% (H) (HR 0.50, p=<0.001)                                                                                                                                                                                                                                  | von Minckwitz et al <sup>26</sup>                       |
| Trastuzumab deruxtecan (T-DXd)  |                  | MBC, refractory                                                           | 115 (HER2+)<br>54 (HER2-low) | Phase 1 T-DXd                         | HER2+ confirmed ORR 59.5%; median DoR 20.7 mo<br>HER2-low confirmed ORR 37%; median DoR 10.4 mo; median PFS 11.1 mo                                                                                                                                                                    | Tamura et al <sup>27</sup> ; Modi et al <sup>28</sup>   |
|                                 | DESTINY-Breast01 | MBC, treated with T-DM1                                                   | 184                          | Phase 2 T-DXd                         | DCR 97.3%; median DoR 14.8 mo; median PFS 16.4 mo                                                                                                                                                                                                                                      | Modi et al <sup>29</sup>                                |
|                                 | DESTINY-Breast03 | MBC, treated with H and taxane                                            | 524                          | Phase 3 T-DXd vs T-DM1                | Median PFS (investigator assessed) 25.1 mo (T-DXd) vs 7.2 mo (T-DM1) (HR 0.26, p<0.001)<br>OS HR 0.55, p=0.007 (did not reach pre-specified cutoff for significance [p<0.000265])                                                                                                      | Cortés et al <sup>30</sup>                              |

|  |          |                                                 |    |               |                                |                             |
|--|----------|-------------------------------------------------|----|---------------|--------------------------------|-----------------------------|
|  | TUXEDO-1 | MBC, newly diagnosed or active brain metastases | 15 | Phase 2 T-DXd | ORR (RANO-BM) 73.3%; CBR 86.7% | Bartsch et al <sup>31</sup> |
|--|----------|-------------------------------------------------|----|---------------|--------------------------------|-----------------------------|

<sup>¶</sup>Pyrotinib approved only in China; \*NSABP B-31: Group 1- Doxorubicin + cyclophosphamide (AC) → paclitaxel (T) q3 weeks vs Group 2- AC →T with 52 weeks of trastuzumab (H); N9831: Group A – AC →T (weekly) vs Group B - AC →T → 52 weeks of H vs Group C- AC→52 weeks of TH; joint analysis compared Groups 1 and A (control groups) with Groups 2 and C (trastuzumab group).

AC, doxorubicin, cyclophosphamide; BC, breast cancer; BM, brain metastases; cape, capecitabine; Cb, carboplatin; CBR, clinical benefit rate; chemo, chemotherapy; D, docetaxel; DCR, disease control rate; DFS, disease-free survival; DoR, duration of response; EBC, early-stage breast cancer; EC, epirubicin, cyclophosphamide; FEC, fluorouracil, epirubicin, cyclophosphamide; H, trastuzumab; HR, hazard ratio; iDFS, invasive disease-free survival; L, lapatinib; MBC, metastatic breast cancer; mo, months; N, neratinib; ORR, overall response rate; OS, overall survival; P, paclitaxel; pCR, pathologic complete response; PFS, progression-free survival; PTZ, pertuzumab; Py, pyrotinib; RANO-BM, response assessment in neuro-oncology brain metastases; RFS, recurrent-free survival; RT, radiation therapy; TTDR, time to distant relapse; TTP, time to progression; y, year.

#### Supplementary References

1. Slamon, D.J., et al. Use of chemotherapy plus a monoclonal antibody against HER2 for metastatic breast cancer that overexpresses HER2. *N. Engl. J. Med.* 344, 783-792 (2001).
2. Piccart-Gebhart, M.J., et al. Trastuzumab after adjuvant chemotherapy in HER2-positive breast cancer. *N. Engl. J. Med.* 353, 1659–1672 (2005).
3. Romond, E.H., et al. Trastuzumab plus adjuvant chemotherapy for operable HER2-positive breast cancer. *N. Engl. J. Med.* 353, 1673–1684 (2005).
4. Slamon, D., et al. Adjuvant trastuzumab in HER2-positive breast cancer. *N. Engl. J. Med.* 365, 1273-1283 (2011).
5. Swain, S.M., et al. Pertuzumab, trastuzumab, and docetaxel in HER2-positive metastatic breast cancer. *N. Engl. J. Med.* 372, 724-734 (2015).
6. von Minckwitz, G., et al, on behalf of APHINITY Steering Committee and Investigators. Adjuvant pertuzumab and trastuzumab in early HER2-positive breast cancer. *N. Engl. J. Med.* 377, 122-131 (2017).
7. Gianni, L., et al. Efficacy and safety of neoadjuvant pertuzumab and trastuzumab in women with locally advanced, inflammatory, or early HER2-positive breast cancer (NeoSphere): a randomised multicentre, open-label, phase 2 trial. *Lancet Oncol.* 13, 25–32 (2012).
8. Schneeweiss, A., et al. Pertuzumab plus trastuzumab in combination with standard neoadjuvant anthracycline-containing and anthracycline-free chemotherapy regimens in patients with HER2-

positive early breast cancer: a randomized phase II cardiac safety study (TRYPHAENA). *Ann. Oncol.* 24, 2278-2284 (2013)

9. Rugo, H.S., et al for the SOPHIA Study Group. Efficacy of margetuximab vs trastuzumab in patients with pretreated ERBB2-positive advanced breast cancer: a phase 3 randomized clinical trial. *JAMA Oncol.* 7, 573-584 (2021).
10. Geyer, C. E., et al. Lapatinib plus capecitabine for HER2-positive advanced breast cancer. *N. Engl. J. Med.* 355, 2733–2743 (2006).
11. Johnston, S., et al. Lapatinib combined with letrozole versus letrozole and placebo as first-line therapy for postmenopausal hormone receptor-positive metastatic breast cancer. *J. Clin. Oncol.* 27, 5538-5546 (2009).
12. Baselga, J., et al. Lapatinib with trastuzumab for HER2-positive early breast cancer (NeoALTTO): a randomised, open-label, multicentre, phase 3 trial. *Lancet.* 379, 633–640 (2012).
13. Untch, M., et al. Lapatinib versus trastuzumab in combination with neoadjuvant anthracycline-taxane-based chemotherapy (GeparQuinto, GBG 44): a randomized phase 3 trial. *Lancet Oncol.* 13, 135–144 (2012).
14. Robidoux, A., et al. Lapatinib as a component of neoadjuvant therapy for HER2-positive operable breast cancer (NSABP protocol B-41): an open-label, randomized phase 3 trial. *Lancet Oncol.* 14, 1183–1192 (2013).
15. Carey, L. A., et al. Molecular heterogeneity and response to neoadjuvant human epidermal growth factor receptor 2 targeting in CALGB 40601, a randomized phase III trial of paclitaxel plus trastuzumab with or without lapatinib. *J. Clin. Oncol.* 34, 542–549 (2016).
16. Fernandez-Martinez, A., et al. Survival, pathologic response, and genomics in CALGB 40601 (Alliance), a neoadjuvant phase III trial of paclitaxel-trastuzumab with or without lapatinib in her2-positive breast cancer. *J. Clin. Oncol.* 38, 4184-4193 (2020).
17. Piccart-Gebhart, M., et al. Adjuvant lapatinib and trastuzumab for early human epidermal growth factor receptor 2-positive breast cancer: results from the randomized phase III adjuvant lapatinib and/or trastuzumab treatment optimization trial. *J. Clin. Oncol.* 34, 1034–1042 (2016).
18. Saura, C., et al. Neratinib plus capecitabine versus lapatinib plus capecitabine in HER2-Positive metastatic breast cancer previously treated with  $\geq 2$  HER2-Directed Regimens: phase III NALA Trial. *J. Clin. Oncol.* 38, 3138–3149 (2020).

19. Chan, A., et al. Final efficacy results of neratinib in HER2-positive hormone receptor-positive early-stage breast cancer from the phase III ExteNET trial. *Clin. Breast Cancer*. 21, 80-91.e7. (2021).
20. Murthy, R.K., et al. Tucatinib, trastuzumab, and capecitabine for HER2-positive metastatic breast cancer. *N. Engl. J. Med.* 382, 597-609 (2020).
21. Lin, N.U., et al. Intracranial efficacy and survival with tucatinib plus trastuzumab and capecitabine for previously treated HER2-positive breast cancer with brain metastases in the HER2CLIMB trial. *J. Clin. Oncol.* 38, 2610-2619 (2020).
22. Xu, B., et al for the PHOEBE Investigators. Pyrotinib plus capecitabine versus lapatinib plus capecitabine for the treatment of HER2-positive metastatic breast cancer (PHOEBE): a multicentre, open-label, randomised, controlled, phase 3 trial. *Lancet Oncol.* 22, 351-360 (2021).
23. Xu, B., et al. Updated overall survival (OS) results from the phase 3 PHOEBE trial of pyrotinib versus lapatinib in combination with capecitabine in patients with HER2-positive metastatic breast cancer. *Cancer Res.* 82(4\_suppl), GS3-02 (2022).
24. Yan, M., et al. Pyrotinib plus capecitabine for patients with human epidermal growth factor receptor 2-positive breast cancer and brain metastases (PERMEATE): a multicentre, single-arm, two-cohort, phase 2 trial. *Lancet Oncol.* 23, 353-361 (2022).
25. Verma, S., et al. Trastuzumab emtansine for HER2-positive advanced breast cancer. *N. Engl. J. Med.* 367, 1783–1791 (2012).
26. von Minckwitz, G., et al for the KATHERINE Investigators. Trastuzumab emtansine for residual invasive HER2-positive breast cancer. *N. Engl. J. Med.* 380, 617-628 (2019).
27. Tamura, K., Tsurutani, J., Takahashi, S., et al. Trastuzumab deruxtecan (DS-8201a) in patients with advanced HER2-positive breast cancer previously treated with trastuzumab emtansine: a dose-expansion, phase 1 study. *Lancet Oncol.* 20, 816-826 (2019).
28. Modi, S., et al. Antitumor activity and safety of trastuzumab deruxtecan in patients with HER2-low-expressing advanced breast cancer: results from a phase 1b study. *J. Clin. Oncol.* 38, 1887-1896 (2020).
29. Modi, S., et al for DESTINY-Breast01 Investigators. Trastuzumab deruxtecan in previously treated HER2-positive breast cancer. *N. Engl. J. Med.* 382, 610-621 (2020).
30. Cortés, J., et al for the DESTINY-Breast03 Trial Investigators. Trastuzumab deruxtecan versus trastuzumab emtansine for breast cancer. *N. Engl. J. Med.* 386, 1143-1154 (2022).

31. Bartsch, R., et al. Trastuzumab-deruxtecan (T-DXd) in HER2-positive breast cancer patients (pts) with active brain metastases: primary outcome analysis from the TUXEDO-1 trial *Ann. Oncol.* 33 (suppl\_3): S198 (2022).
